# Supplementary material for: SnCl4-catalyzed isomerization/dehydration of xylose and glucose to furanics in water
Source: Royal Society of Chemistry journal article supplement (doi:10.1039/c5cy00077g), 2015-01-01
Supplement: c5cy00077g1.pdf [file c5cy00077g1.pdf]

## SnCl<sub>4</sub>-Catalyzed Isomerization/Dehydration of Xylose and Glucose to Furanics in Water

Kristopher R. Enslow and Alexis T. Bell\*

Energy Biosciences Institute  
Energy Biosciences Building  
2151 Berkeley Way  
Berkeley, CA 94704-1011, USA

and

Department of Chemical and Biomolecular Engineering  
University of California, Berkeley  
Berkeley, CA 94720-1462, USA

### Supplemental Information

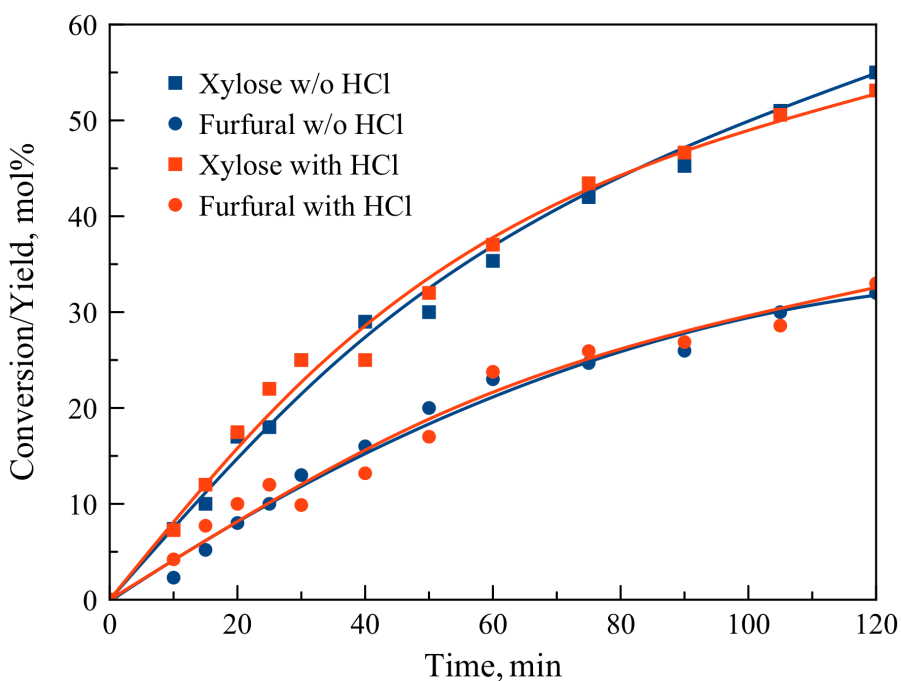

**Figure S1.** The conversion of xylose (750 mM) and the yield of furfural at 140 °C catalyzed by 25 mM SnCl<sub>4</sub> in a single aqueous phase with and without 50 mM HCl.

A.

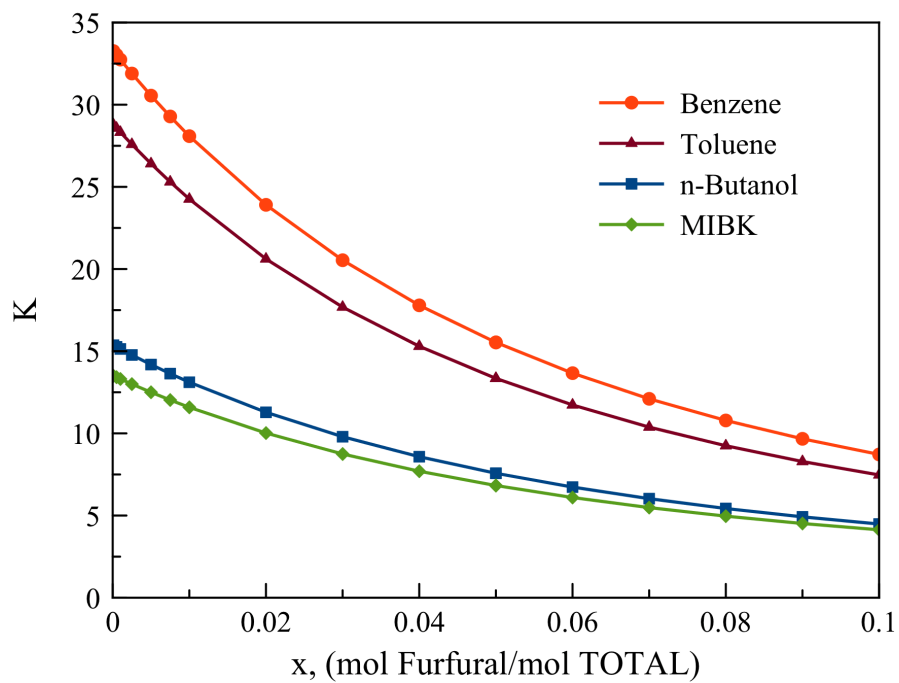

B.

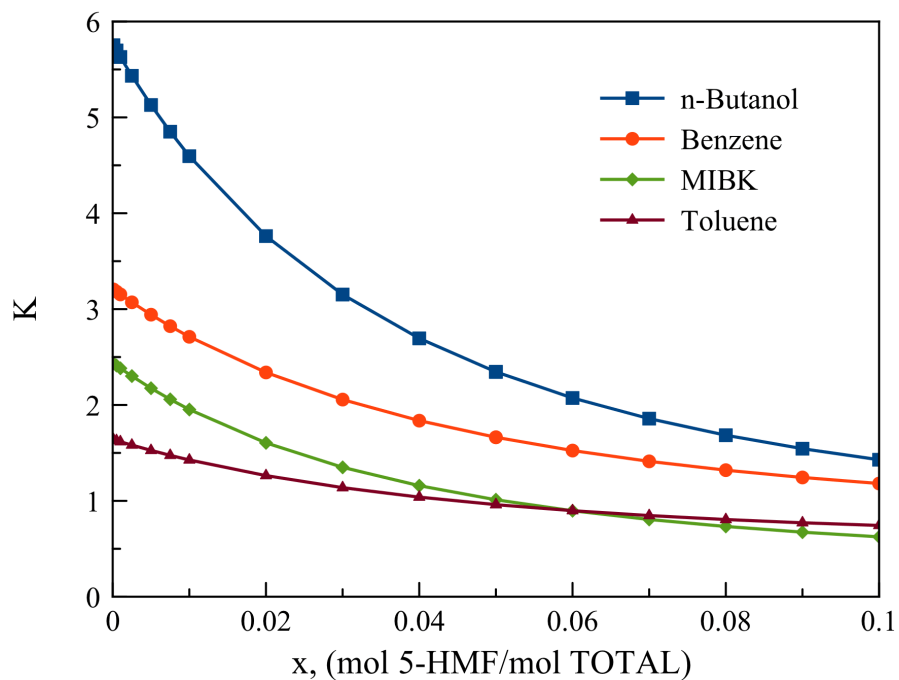

**Figure S2.** The partition coefficients for **A)** furfural and **B)** 5-HMF between water and the organic solvents benzene, toluene, *n*-butanol, and MIBK determined using UNIFAC.
